# Supplementary material for: Effect of Individual Omega-3 Fatty Acids on the Risk of Prostate Cancer: A Systematic Review and Dose-Response Meta-Analysis of Prospective Cohort Studies
Source: PubMed Central journal article supplement (PMC4375280; doi:10.2188/jea.je20140120), 2015-04-05
Supplement: je-25-261-s002.pdf [file je-25-261-s002.pdf]

**eTable 2. Characteristics of included studies for the association between dietary n-3 PUFA and risk of prostate cancer <sup>1</sup>**

| Study                               | Location    | Patient Characteristics |                           |                        |                 |                    | Study type         | Exposure measurement                 | n-3 PUFA type                             | Exposure range                                                                                                                                                                                                                          | Study Quality |
|-------------------------------------|-------------|-------------------------|---------------------------|------------------------|-----------------|--------------------|--------------------|--------------------------------------|-------------------------------------------|-----------------------------------------------------------------------------------------------------------------------------------------------------------------------------------------------------------------------------------------|---------------|
|                                     |             | Follow-up (years)       | Age (years) range or mean | Number of Participants | Number of Cases | Number of Controls |                    |                                      |                                           |                                                                                                                                                                                                                                         |               |
| Schuurman et al. <sup>16</sup> 1999 | Netherlands | 6.3                     | 55-69                     | 58,279                 | 642             |                    | Case-cohort        | Diet (g/day)<br>150-item FFQ         | EPA<br>DHA                                | Highest: 0.10 g/day<br>Reference: 0<br>Highest: 0.18 g/day<br>Reference: 0.01 g/day                                                                                                                                                     | 7             |
| Wallström et al. <sup>18</sup> 2007 | Sweden      | 11                      | 45-73                     | 10,564                 | 817             |                    | prospective cohort | Diet (g/day)<br>168-item FFQ         | ALA<br>EPA<br>DHA<br>EPA+DHA<br>Total n-3 | Highest: 2.7 g/day<br>Reference: 1.4 g/day<br>Highest: 0.44 g/day<br>Reference: 0.03 g/day<br>Highest: 0.86 g/day<br>Reference: 0.12 g/day<br>Highest: 1.3 g/day<br>Reference: 0.16 g/day<br>Highest: 3.8 g/day<br>Reference: 1.8 g/day | 9             |
| Park et al. <sup>17</sup> 2007      | USA         | 8.0                     | >45                       | 82,483                 | 4,404           |                    | Prospective cohort | Diet (g/1,000 kcal)<br>>180-item FFQ | ALA<br>EPA<br>DHA                         | Highest: 2.14 g/day<br>Reference: 1.1 g/day<br>Highest: 0.037 g/day<br>Reference: 0.008 g/day<br>Highest: 0.07 g/day<br>Reference: 0.01 g/day                                                                                           | 7             |

**eTable 2. Characteristics of included studies for the association between dietary n-3 PUFA and risk of prostate cancer<sup>1</sup> (Continued)**

|                                            |         |     |       |         |        |     |                        |                                    | Total n-3 | Highest: 2.26 g/day<br>Reference: 1.18 g/day |   |
|--------------------------------------------|---------|-----|-------|---------|--------|-----|------------------------|------------------------------------|-----------|----------------------------------------------|---|
| Pelser et al. <sup>31</sup><br>2013        | USA     | 9   | 50-71 | 288,268 | 18,934 |     | Prospective<br>cohort  | Diet<br>(% energy)<br>124-item FFQ | ALA       | Highest: 0.88%<br>Reference: 0.41%           | 7 |
|                                            |         |     |       |         |        |     |                        |                                    | EPA       | Highest: 0.036%<br>Reference: 0.003%         |   |
|                                            |         |     |       |         |        |     |                        |                                    | DHA       | Highest: 0.0068%<br>Reference: 0.001%        |   |
|                                            |         |     |       |         |        |     |                        |                                    | DPA       | Highest: 0.014%<br>Reference: 0              |   |
|                                            |         |     |       |         |        |     |                        |                                    | EPA+DHA   | Highest: 0.103%<br>Reference: 0.013%         |   |
|                                            |         |     |       |         |        |     |                        |                                    | Total n-3 | Highest: 0.95%<br>Reference: 0.45%           |   |
| Männistö <sup>30</sup><br>2003             | Finland | 5-8 | 50-59 | 290,406 | 198    | 198 | Nested<br>case-control | Diet (g/day)<br>276-item FFQ       | ALA       | Highest: 2.3 g/day<br>Reference: 1.0 g/day   | 6 |
|                                            |         |     |       |         |        |     |                        |                                    | DHA       | Highest: 0.43 g/day<br>Reference: 0.11 g/day |   |
|                                            |         |     |       |         |        |     |                        |                                    | EPA       | Highest: 0.20 g/day<br>Reference: 0.05 g/day |   |
| Giovanucci<br>et al. <sup>32</sup><br>2007 | USA     | 16  | 40-75 | 51,529  | 3,544  |     | Prospective<br>cohort  | Diet (g/day)<br>131-item FFQ       | ALA       | Highest: 1.43 g/day<br>Reference: 0.39 g/day | 8 |

**eTable 2. Characteristics of included studies for the association between dietary n-3 PUFA and risk of prostate cancer<sup>1</sup> (Continued)**

|                                           |           |     |       |        |       |       |                       |                                    |                                                       |                                                                                                                                                                                                                                               |   |
|-------------------------------------------|-----------|-----|-------|--------|-------|-------|-----------------------|------------------------------------|-------------------------------------------------------|-----------------------------------------------------------------------------------------------------------------------------------------------------------------------------------------------------------------------------------------------|---|
| Leitzmann<br>et al. <sup>33</sup><br>2004 | USA       | 14  | 40-75 | 47,866 | 2,965 |       | Prospective           | Diet<br>(% energy)<br>131-item FFQ | ALA<br><br>EPA<br><br>DHA<br><br>EPA+DHA              | Highest: 0.62%<br>Reference: 0.19%<br>Highest: 0.033%<br>Reference: 0.007%<br>Highest: 0.14%<br>Reference: 0.016%<br>Highest: 0.249%<br>Reference: 0.029%                                                                                     | 8 |
| Koralek<br>et al <sup>13</sup><br>2011    | USA       | 5.1 | 55-74 | 29,592 | 1,898 |       | Prospective<br>cohort | Diet (g/day)<br>137-item FFQ       | ALA                                                   | Highest: 1.75 g/day<br>Reference: 1.38 g/day                                                                                                                                                                                                  | 8 |
| Bassett et<br>al. <sup>27</sup><br>2013   | Australia | 8.9 | 27-80 | 17,045 | 464   | 1,717 | Case-cohort           | Diet (g/day)<br>121-item FFQ       | ALA<br><br>EPA<br><br>DHA<br><br>DPA<br><br>Total n-3 | Highest: 1.28 g/day<br>Reference: 0.79 g/day<br>Highest: 0.19 g/day<br>Reference: 0.04 g/day<br>Highest: 0.33 g/day<br>Reference: 0.07 g/day<br>Highest: 0.07 g/day<br>Reference: 0.009 g/day<br>Highest: 1.75 g/day<br>Reference: 0.99 g/day | 6 |

<sup>1</sup> EPA, eicosapentaenoic acid; DHA, docosahexaenoic acid; DPA, docosapentaenoic acid; ALA, alpha-linolenic acid; FFQ, food frequency questionnaire.
