# Supplementary material for: Effect of Individual Omega-3 Fatty Acids on the Risk of Prostate Cancer: A Systematic Review and Dose-Response Meta-Analysis of Prospective Cohort Studies
Source: PubMed Central journal article supplement (PMC4375280; doi:10.2188/jea.je20140120), 2015-04-05
Supplement: je-25-261-s003.pdf [file je-25-261-s003.pdf]

**eTable 3. Characteristics of included studies for the association between blood n-3 PUFA and risk of prostate cancer <sup>1</sup>**

| Study                                 | Location                 | Follow-up (years) | Patient Characteristics       |                        |                 |                    | Study type          | Exposure measurement | n-3 PUFA type | Exposure range                     | Study Quality |
|---------------------------------------|--------------------------|-------------------|-------------------------------|------------------------|-----------------|--------------------|---------------------|----------------------|---------------|------------------------------------|---------------|
|                                       |                          |                   | Age (years) range or mean     | Number of Participants | Number of Cases | Number of Controls |                     |                      |               |                                    |               |
| Crowe et al. <sup>37</sup><br>2008    | Eight European Countries | 4.2               | cases: 60.4<br>controls: 60.1 | 137,001                | 962             | 1,061              | Nested case-control | Plasma PL quintile   | ALA           | Highest: 1.50%<br>Reference: 0.09% | 7             |
|                                       |                          |                   |                               |                        |                 |                    |                     |                      | EPA           | Highest: 1.65%<br>Reference: 0.48% |               |
|                                       |                          |                   |                               |                        |                 |                    |                     |                      | DHA           | Highest: 4.97%<br>Reference: 2.48% |               |
|                                       |                          |                   |                               |                        |                 |                    |                     |                      | DPA           | Highest: 2.02%<br>Reference: 0.71% |               |
| Chavarro et al. <sup>15</sup><br>2007 | USA                      | 13                | 40-84                         | 14,916                 | 476             | 476                | Nested case-control | Whole blood quintile | ALA           | Highest: 1.95%<br>Reference: 0.24% | 6             |
|                                       |                          |                   |                               |                        |                 |                    |                     |                      | EPA           | Highest: 2.36%<br>Reference: 1.28% |               |
|                                       |                          |                   |                               |                        |                 |                    |                     |                      | DHA           | Highest: 3.37%<br>Reference: 0.77% |               |
|                                       |                          |                   |                               |                        |                 |                    |                     |                      | DPA           | Highest: 1.19%<br>Reference: 0.77% |               |
| Bassett <sup>27</sup><br>2013         | Australia                | 8.9               | 27-80                         | 17,045                 | 464             | 1,717              | Case-cohort         | Plasma PL quintile   | ALA           | Highest: 0.25%<br>Reference: 0.09% | 6             |
|                                       |                          |                   |                               |                        |                 |                    |                     |                      | LC-n-3        | Highest: 6.70%<br>Reference: 3.66% |               |

|                                       |         |      |       |         |     |     |                        |                   |     | EPA            | Highest: 1.67%   |  |  |
|---------------------------------------|---------|------|-------|---------|-----|-----|------------------------|-------------------|-----|----------------|------------------|--|--|
|                                       |         |      |       |         |     |     |                        |                   |     |                | Reference: 0.59% |  |  |
|                                       |         |      |       |         |     |     |                        |                   |     | DHA            | Highest: 5.34%   |  |  |
|                                       |         |      |       |         |     |     |                        |                   |     |                | Reference: 2.75% |  |  |
|                                       |         |      |       |         |     |     |                        |                   |     | DPA            | Highest: 1.59%   |  |  |
|                                       |         |      |       |         |     |     |                        |                   |     |                | Reference: 0.98% |  |  |
|                                       |         |      |       |         |     |     |                        |                   |     | total n-3      | Highest: 8.38%   |  |  |
|                                       |         |      |       |         |     |     |                        |                   |     |                | Reference: 5.10% |  |  |
| Männistö et al. <sup>30</sup><br>2003 | Finland | 5--8 | 50-69 | 290,406 | 198 | 198 | Nested<br>case-control | Serum<br>quartile | ALA | Highest: 0.91% | 6                |  |  |
|                                       |         |      |       |         |     |     |                        |                   |     |                | Reference: 0.47% |  |  |
|                                       |         |      |       |         |     |     |                        |                   |     | DHA            | Highest: 1.05%   |  |  |
|                                       |         |      |       |         |     |     |                        |                   |     |                | Reference: 0.55% |  |  |
|                                       |         |      |       |         |     |     |                        |                   |     | EPA            | Highest: 2.74%   |  |  |
|                                       |         |      |       |         |     |     |                        |                   |     |                | Reference: 0.92% |  |  |
| Harvei et al. <sup>8</sup><br>1997    | Norway  | 11.6 | 50    | NR      | 141 | 141 | Nested<br>case-control | Serum<br>quartile | ALA | Highest: 0.21% | 7                |  |  |
|                                       |         |      |       |         |     |     |                        |                   |     |                | Reference: 0.06% |  |  |
|                                       |         |      |       |         |     |     |                        |                   |     | EPA            | Highest: 2.38%   |  |  |
|                                       |         |      |       |         |     |     |                        |                   |     |                | Reference: 0.41% |  |  |
|                                       |         |      |       |         |     |     |                        |                   |     | DHA            | Highest: 6.36%   |  |  |
|                                       |         |      |       |         |     |     |                        |                   |     |                | Reference: 1.65% |  |  |
|                                       |         |      |       |         |     |     |                        |                   |     | DPA            | Highest: 1.33%   |  |  |
|                                       |         |      |       |         |     |     |                        |                   |     |                | Reference: 0.44% |  |  |
|                                       |         |      |       |         |     |     |                        |                   |     | total n-3      | Highest: 9.07%   |  |  |
|                                       |         |      |       |         |     |     |                        |                   |     |                | Reference: 5.23% |  |  |

**eTable 3. Characteristics of included studies for the association between blood n-3 PUFA and risk of prostate cancer <sup>1</sup> (Continued)**

|                                    |     |     |       |        |       |       |                        |                                     |                                                       |                                                                                                                                                                                             |   |
|------------------------------------|-----|-----|-------|--------|-------|-------|------------------------|-------------------------------------|-------------------------------------------------------|---------------------------------------------------------------------------------------------------------------------------------------------------------------------------------------------|---|
| Park et al. <sup>36</sup><br>2009  | USA | 1.9 | 45-75 | 31,136 | 376   | 729   | Nested<br>case-control | Erythrocyte<br>membrane<br>quartile | ALA<br><br>EPA<br><br>DHA<br><br>DPA<br><br>total n-3 | Highest: 0.80%<br>Reference: 0.17%<br>Highest: 0.88%<br>Reference: 0.21%<br>Highest: 8.73%<br>Reference: 2.75%<br>Highest: 2.15%<br>Reference: 0.63%<br>Highest: 11.77%<br>Reference: 4.00% | 8 |
| Brasky et al <sup>14</sup><br>2011 | USA | 7   | 55-84 | 18,882 | 1,658 | 1,803 | Nested<br>case-control | Serum PL<br>quartile                | ALA<br><br>EPA<br><br>DHA<br><br>EPA+DHA              | Highest: 0.20%<br>Reference: 0.06%<br>Highest: 0.84%<br>Reference: 0.22%<br>Highest: 3.58%<br>Reference: 1.13%<br>Highest: 4.38%<br>Reference: 1.39%                                        | 8 |
| Cheng et al. <sup>35</sup><br>2013 | USA | 7   | 45-69 | 18,314 | 641   | 1,398 | Nested<br>case-control | Serum PL<br>quartile                | ALA<br><br>EPA<br><br>DHA                             | Highest: 0.12%<br>Reference: 0.05%<br>Highest: 0.84%<br>Reference: 0.22%<br>Highest: 3.43%                                                                                                  | 8 |

Reference: 1.06%

**eTable 3. Characteristics of included studies for the association between blood n-3 PUFA and risk of prostate cancer 1 (Continued)**

|                                     |     |   |     |        |     |       |             |                       |           |                  |   |
|-------------------------------------|-----|---|-----|--------|-----|-------|-------------|-----------------------|-----------|------------------|---|
|                                     |     |   |     |        |     |       |             |                       | DPA       | Highest: 0.95%   |   |
|                                     |     |   |     |        |     |       |             |                       |           | Reference: 0.36% |   |
|                                     |     |   |     |        |     |       |             |                       | total n-3 | Highest: 4.80%   |   |
|                                     |     |   |     |        |     |       |             |                       |           | Reference: 3.53% |   |
| Brasky et al. <sup>34</sup><br>2013 | USA | 6 | >50 | 35,533 | 834 | 1,393 | case-cohort | Plasma PL<br>quartile | ALA       | Highest: 0.19%   | 8 |
|                                     |     |   |     |        |     |       |             |                       |           | Reference: 0.05% |   |
|                                     |     |   |     |        |     |       |             |                       | EPA       | Highest: 0.94%   |   |
|                                     |     |   |     |        |     |       |             |                       |           | Reference: 0.22% |   |
|                                     |     |   |     |        |     |       |             |                       | DHA       | Highest: 3.96%   |   |
|                                     |     |   |     |        |     |       |             |                       |           | Reference: 1.17% |   |
|                                     |     |   |     |        |     |       |             |                       | DPA       | Highest: 1.05%   |   |
|                                     |     |   |     |        |     |       |             |                       |           | Reference: 0.38% |   |
|                                     |     |   |     |        |     |       |             |                       | LC-n-3    | Highest: 5.76%   |   |
|                                     |     |   |     |        |     |       |             |                       |           | Reference: 1.84  |   |

<sup>1</sup> EPA, eicosapentaenoic acid; DHA, docosahexaenoic acid; DPA, docosapentaenoic acid; ALA, alpha-linolenic acid; PL, phospholipid.
