# Supplementary material for: Effect of Individual Omega-3 Fatty Acids on the Risk of Prostate Cancer: A Systematic Review and Dose-Response Meta-Analysis of Prospective Cohort Studies
Source: PubMed Central journal article supplement (PMC4375280; doi:10.2188/jea.je20140120), 2015-04-05
Supplement: je-25-261-s005.pdf [file je-25-261-s005.pdf]

**eTable 5. Case ascertainment of included studies in the meta-analysis**

| <b>Study source</b>                                                  | <b>Case ascertainment</b>                                                                                                                                                                                                                                                                                         |
|----------------------------------------------------------------------|-------------------------------------------------------------------------------------------------------------------------------------------------------------------------------------------------------------------------------------------------------------------------------------------------------------------|
| Crowe 2008, Europe <sup>37</sup><br>Harvei 1997, Norway <sup>8</sup> | Dutch National Cancer Registry and the Regional Cancer Registries Amsterdam, East, and Limburg provided data on cancer incidence.<br>Identified by matching the serum bank files with the Cancer Registry, using the unique 11-digit personal identification number that is allocated to every citizen of Norway. |
| Männistö 2003, Finland <sup>30</sup>                                 | Ascertained using the Finnish Cancer Registry and the Register of Causes of Death.                                                                                                                                                                                                                                |
| Park 2009, USA <sup>36</sup>                                         | Ascertained through the tumor registries of the Surveillance, Epidemiology and End Results (SEER) Program of the National Cancer Institute covering Hawaii and California.                                                                                                                                        |
| Chavarro 2007, USA <sup>15</sup>                                     | By requesting hospital records and pathology reports for review by study physicians from the End Points Committee.                                                                                                                                                                                                |
| Brasky 2011, USA <sup>14</sup>                                       | By prostate biopsy.                                                                                                                                                                                                                                                                                               |
| Bassett 2013, Australia <sup>27</sup>                                | Identified by notifications of first diagnoses of prostate cancer to the Victorian Cancer Registry or the Australian Cancer Database.                                                                                                                                                                             |
| Cheng 2013, USA <sup>35</sup>                                        | By review of medical records and pathology reports in Western Washington Cancer Surveillance System, a part of the Surveillance, Epidemiology, and End Results registries.                                                                                                                                        |
| Brasky 2013, USA <sup>34</sup>                                       | By obtaining pathology reports and, when possible, tissue. Almost all cases included were reviewed centrally for pathological confirmation and grading using the Gleason system.                                                                                                                                  |
| Schuurman 1999, <sup>16</sup>                                        | Detected by computerized record linkage with all nine cancer registries in The Netherlands and with the Dutch national data base of pathology reports.                                                                                                                                                            |
| Koralek 2006, USA <sup>13</sup>                                      | Autopsy data, supporting medical/pathologic records were used to confirm the diagnosis and stage and grade information.                                                                                                                                                                                           |
| Gioannucci 2007, USA <sup>32</sup>                                   | Ascertained by relevant hospital records and pathology reports.                                                                                                                                                                                                                                                   |
| Leitzmann 2004, USA <sup>33</sup>                                    | Using medical records and pathology reports to confirm the diagnosis and obtain further details.                                                                                                                                                                                                                  |
| Park 2007, USA <sup>17</sup>                                         | Identified by linkage of the cohort to 3 population-based cancer registries in Hawaii and California that are all members of the National Cancer Institute's Surveillance.                                                                                                                                        |
| Wallström 2007, Sweden <sup>18</sup>                                 | Ascertained by record linkage with the National Cancer Register (Sweden).                                                                                                                                                                                                                                         |
| Pelser 2013, USA <sup>31</sup>                                       | Ascertained by linkage to 8 state cancer registries and 3 additional state cancer registries (Arizona, Nevada, and Texas).                                                                                                                                                                                        |
