# Supplementary material for: Effect of Individual Omega-3 Fatty Acids on the Risk of Prostate Cancer: A Systematic Review and Dose-Response Meta-Analysis of Prospective Cohort Studies
Source: PubMed Central journal article supplement (PMC4375280; doi:10.2188/jea.je20140120), 2015-04-05
Supplement: je-25-261-s006.pdf [file je-25-261-s006.pdf]

**eTable 6. Quality assessment of included studies on individual n-3 polyunsaturated fatty acids and risk of prostate cancer<sup>1</sup>**

| <b>Study</b>                                          | <b>Selection</b> | <b>Comparability</b> | <b>Outcome/Exposure</b> | <b>Overall quality</b> |
|-------------------------------------------------------|------------------|----------------------|-------------------------|------------------------|
| Harvei et al. <sup>8</sup> , 1997, Norway             | 4                | 0                    | 3                       | 7                      |
| Schuurman et al. <sup>16</sup> , 1999, Netherlands    | 4                | 1                    | 2                       | 7                      |
| Männistö et al. <sup>30</sup> , 2003, Finland         | 3                | 0                    | 3                       | 6                      |
| Leitzmann et al. <sup>33</sup> , 2004, USA            | 3                | 2                    | 3                       | 8                      |
| Koralek et al. <sup>13</sup> , 2006, USA              | 4                | 2                    | 2                       | 8                      |
| Chavarro et al. <sup>15</sup> , 2007, USA             | 3                | 1                    | 2                       | 6                      |
| Park et al. <sup>17</sup> , 2007, USA                 | 4                | 1                    | 2                       | 7                      |
| Wallström et al. <sup>18</sup> , 2007, Sweden         | 4                | 2                    | 3                       | 9                      |
| Givannucci et al. <sup>32</sup> , 2007, USA           | 3                | 2                    | 3                       | 8                      |
| Crowe et al. <sup>37</sup> , 2008, European countries | 4                | 1                    | 2                       | 7                      |
| Park et al. <sup>36</sup> , 2009, USA                 | 4                | 2                    | 2                       | 8                      |
| Brasky et al. <sup>14</sup> , 2011, USA               | 4                | 2                    | 1                       | 7                      |
| Brasky et al. <sup>34</sup> , 2013, USA               | 4                | 1                    | 2                       | 7                      |
| Cheng et al. <sup>35</sup> , 2013, USA                | 4                | 2                    | 2                       | 8                      |
| Bassett et al. <sup>27</sup> , 2013, Australia        | 3                | 0                    | 3                       | 6                      |
| Pelser et al. <sup>31</sup> , 2013, USA               | 3                | 2                    | 2                       | 7                      |

<sup>1</sup>The study quality was assessed according to the Newcastle Ottawa Quality assessment scale for cohort studies and case-control studies. The scale awards a maximum of 9 points to each study: 4 for selection, 2 for comparability, and 3 for assessment of outcomes (for cohort study) or exposures (for case-control study). Comparability was assessed based on the adjustment of age and BMI
