# Supplementary material for: Effect of Individual Omega-3 Fatty Acids on the Risk of Prostate Cancer: A Systematic Review and Dose-Response Meta-Analysis of Prospective Cohort Studies
Source: PubMed Central journal article supplement (PMC4375280; doi:10.2188/jea.je20140120), 2015-04-05
Supplement: je-25-261-s007.pdf [file je-25-261-s007.pdf]

**eTable 7. Subgroup analyses for per 0.1% increment<sup>a</sup> of blood ALA<sup>b</sup> concentration and risk of prostate cancer**

| Subgroup factor                      | Number of studies | Relative risk (95% CI) | Heterogeneity within sub-group |          | Heterogeneity between sub-groups | Nonlinearity |
|--------------------------------------|-------------------|------------------------|--------------------------------|----------|----------------------------------|--------------|
|                                      |                   |                        | I <sup>2</sup>                 | Degree   | p value                          | p value      |
| <b>Overall analysis</b>              | 9                 | 1.00 (0.98, 1.03)      | 18%                            | -        | -                                | 0.70         |
| <b>Study design</b>                  |                   |                        |                                |          |                                  |              |
| Nested case-control                  | 7                 | 1.01 (0.98, 1.04)      | 24%                            | Low      | 0.21                             | 0.53         |
| Case-cohort                          | 2                 | -                      | -                              | -        | -                                | -            |
| <b>Grade or stage of cancer</b>      |                   |                        |                                |          |                                  |              |
| Aggressive                           | 5                 | 0.98 (0.87, 1.11)      | 42%                            | Moderate | -                                | 0.44         |
| Non-aggressive                       | 4                 |                        |                                |          |                                  | <0.01        |
| <b>Follow-up duration</b>            |                   |                        |                                |          |                                  |              |
| ≤7 years                             | 6                 | 1.00 (0.99, 1.02)      | 18%                            | Low      | 0.22                             | 0.98         |
| >7 years                             | 3                 | 1.06 (0.94, 1.20)      | 58%                            | Moderate |                                  | 0.62         |
| <b>Regions</b>                       |                   |                        |                                |          |                                  |              |
| USA                                  | 5                 | 1.00 (0.98, 1.03)      | 58%                            | Moderate | 0.56                             | 0.57         |
| European countries                   | 3                 | 1.02 (0.97, 1.06)      | 8%                             | Low      |                                  |              |
| Australia                            | 1                 | -                      | -                              | -        | -                                | -            |
| <b>Covariate adjustment</b>          |                   |                        |                                |          |                                  |              |
| Adjusted for age                     | 5                 | 1.00 (0.95, 1.04)      | 8%                             | Low      | 0.58                             | 0.57         |
| Not adjusted for age                 | 4                 | 1.01 (0.97, 1.05)      | 41%                            | Moderate |                                  | 0.68         |
| Adjusted for BMI                     | 4                 | 1.01 (0.99, 1.03)      | 0%                             | Low      | 0.80                             | 0.69         |
| Not adjusted for BMI                 | 5                 | 1.00 (0.94, 1.07)      | 53%                            | Moderate |                                  | 0.94         |
| Adjusted for alcohol consumption     | 4                 | 1.01 (0.99, 1.03)      | 0%                             | Low      | 0.90                             | 0.79         |
| Not adjusted for alcohol consumption | 5                 | 1.01 (0.95, 1.06)      | 52%                            | Moderate |                                  | 0.38         |

|                                                    |   |                   |     |          |      |      |
|----------------------------------------------------|---|-------------------|-----|----------|------|------|
| Adjusted for smoking status                        | 4 | 1.01 (0.99, 1.03) | 0%  | Low      | 0.30 | 0.49 |
| Not adjusted for smoking status                    | 5 | 0.99 (0.94, 1.04) | 44% | Moderate |      | 0.39 |
| Adjusted for family history of prostate cancer     | 4 | 1.02 (0.98, 1.06) | 47% | Moderate | 0.11 | 0.55 |
| Not adjusted for family history of prostate cancer | 5 | --                | -   | -        |      | 0.02 |

**Risk expression**

|                   |   |                   |     |          |      |      |
|-------------------|---|-------------------|-----|----------|------|------|
| Hazard/rate ratio | 2 | -                 | -   |          | -    | -    |
| Relative risk     | 2 | -                 | -   |          | -    | -    |
| Odds ratio        | 5 | 1.00 (0.95, 1.06) | 39% | Moderate | 0.57 | 0.22 |

BMI, body mass index; CI, confidence interval; PCa, prostate cancer.

<sup>a</sup> The range of blood ALA concentration in the included studies is 0.06% to 1.49%

<sup>b</sup> ALA: alpha-linolenic acid
