# Supplementary material for: Effect of Individual Omega-3 Fatty Acids on the Risk of Prostate Cancer: A Systematic Review and Dose-Response Meta-Analysis of Prospective Cohort Studies
Source: PubMed Central journal article supplement (PMC4375280; doi:10.2188/jea.je20140120), 2015-04-05
Supplement: je-25-261-s008.pdf [file je-25-261-s008.pdf]

**eTable 8. Subgroup analyses per 0.2% increment<sup>a</sup> of blood DPA<sup>b</sup> concentration and risk of prostate cancer**

| Subgroup factor                      | Number of studies | Relative risk (95% CI) | Heterogeneity within sub-group |          | Heterogeneity between sub-groups | Nonlinearity |
|--------------------------------------|-------------------|------------------------|--------------------------------|----------|----------------------------------|--------------|
|                                      |                   |                        | I <sup>2</sup>                 | Degree   | p value                          | p value      |
| <b>Overall analysis</b>              | 7                 | 0.99 (0.96, 1.02)      |                                |          | -                                |              |
| <b>Study design</b>                  |                   |                        |                                |          |                                  |              |
| Nested case-control                  | 5                 | 0.97 (0.94, 1.00)      | 44%                            | Moderate | <0.01                            | 0.28         |
| Case-cohort                          | 2                 | -                      | -                              | -        | -                                | -            |
| <b>Follow-up duration</b>            |                   |                        |                                |          |                                  |              |
| ≤7 years                             | 4                 | 1.00 (0.96, 1.04)      | 71%                            | Moderate | 0.11                             | 0.21         |
| >7 years                             | 3                 | 0.96 (0.91, 1.01)      | 62%                            | Moderate |                                  | 0.64         |
| <b>Regions</b>                       |                   |                        |                                |          |                                  |              |
| USA                                  | 4                 | 0.99 (0.94, 1.04)      | 78%                            | High     | 0.78                             | 0.06         |
| European countries                   | 2                 | -                      | -                              | -        | -                                | -            |
| Australia                            | 1                 | -                      | -                              | -        | -                                | -            |
| <b>Covariate adjustment</b>          |                   |                        |                                |          |                                  |              |
| Adjusted for age                     | 4                 | 0.99 (0.94, 1.04)      | 78%                            | High     | 0.78                             | 0.06         |
| Not adjusted for age                 | 3                 | 0.99 (0.95, 1.03)      | 57%                            | Moderate |                                  | 0.91         |
| Adjusted for BMI                     | 3                 | 0.99 (0.96, 1.01)      | 18%                            | Low      | 0.50                             | 0.31         |
| Not adjusted for BMI                 | 4                 | 0.98 (0.92, 1.05)      | 80%                            | High     |                                  | 0.33         |
| Adjusted for alcohol consumption     | 3                 | 1.00 (0.97, 1.02)      | 0%                             | Low      | 0.52                             | 0.68         |
| Not adjusted for alcohol consumption | 4                 | 0.97 (0.91, 1.04)      | 82%                            | High     |                                  | 0.08         |
| Adjusted for smoking status          | 4                 | 0.99 (0.96, 1.01)      | 23%                            | Low      | 0.72                             | 0.79         |
| Not adjusted for smoking status      | 3                 | 0.98 (0.90, 1.07)      | 86%                            | High     |                                  | 0.15         |

|                                                    |   |                   |     |          |      |      |
|----------------------------------------------------|---|-------------------|-----|----------|------|------|
| Adjusted for family history of prostate cancer     | 3 | 0.96 (0.90, 1.02) | 70% | Moderate | 0.29 | 0.91 |
| Not adjusted for family history of prostate cancer | 4 | 1.00 (0.96, 1.04) | 71% | Moderate |      | 0.08 |
| <b>Risk expression</b>                             |   |                   |     |          |      |      |
| Hazard/rate ratio                                  | 2 | -                 | -   |          | -    | -    |
| Relative risk                                      | 2 | -                 | -   |          | -    | -    |
| Odds ratio                                         | 3 | 0.96 (0.93, 0.99) | 7%  | Low      | 0.02 | 0.06 |

BMI, body mass index; CI, confidence interval; PCa, prostate cancer.

<sup>a</sup> The range of blood ALA concentration in the included studies is 0.06% to 1.49%

<sup>b</sup> DPA: docosapentaenoic acid
